# Supplementary material for: Vaccination Coverages Among Splenectomized Patients: A Retrospective Study from an Italian Southern Province
Source: MDPI journal article supplement (doi:10.3390/vaccines13020138), 2025-01-28
Supplement: s1 [file vaccines-3405011-supplementary.pdf › vaccines-3405011-supplementary.pdf]

**Table S1. Factors associated to vaccination status**

|                      |        | <b>MenACWY</b> | <b>MenB</b> | <b>PCV</b>  | <b>Covid19</b> |
|----------------------|--------|----------------|-------------|-------------|----------------|
|                      |        | RRR(95%CI)     | RRR(95%CI)  | RRR(95%CI)  | RRR(95%CI)     |
| Partially vaccinated | Male   | 1.50 (0.16-    | 1.79 (0.68- | 1.11 (0.08- | 0.96(0.09-     |
|                      | gender | 13.81)         | 1.99)       | 8.11)       | 4.84)          |
|                      | Age    | 0.99(0.91-     | 1.09(0.99-  | 0.97(0.89-  | 0.99(0.84-     |
|                      |        | 1.07)          | 1.19)       | 1.06)       | 1.08)          |
|                      | Trauma | 1.01(0.67-     | 1.02(0.59-  | 0.99(0.60-  | 1.04(0.72-     |
|                      |        | 2.95)          | 3.02)       | 2.98)       | 2.88)          |
| Fully vaccinated     | Male   | 1.74(0.20-     | 1.79 (0.21- | 1.27 (0.18- | 0.89(0.09-     |
|                      | gender | 15.33)         | 17.23)      | 8.11)       | 4.84)          |
|                      | Age    | 0.99(0.92-     | 0.99(0.92-  | 0.96(0.88-  | 1.00(0.84-     |
|                      |        | 1.07)          | 1.07)       | 13.72)      | 1.04)          |
|                      | Trauma | 1.01(0.88-     | 1.00(0.82-  | 1.00(0.90-  | 1.03(0.79-     |
|                      |        | 2.55)          | 2.66)       | 2.58)       | 2.69)          |

Abbreviations: RRR= relative risk ratio; 95%CI= 95% confidence interval
